# Supplementary material for: MAPK/MAK/MRK overlapping kinase (MOK) controls microglial inflammatory/type-I IFN responses via Brd4 and is involved in ALS
Source: PubMed Central journal article supplement — Proc Natl Acad Sci U S A. 2023 Jul 3;120(28):e2302143120. doi: 10.1073/pnas.2302143120 (PMC10334760; doi:10.1073/pnas.2302143120), 2023-07-03
Supplement: pnas.2302143120.sapp.pdf [file pnas.2302143120.sapp.pdf]

## Supporting Information for

### MAPK/MAK/MRK overlapping kinase (MOK) controls microglial inflammatory/type-I IFN responses via Brd4 and is involved in ALS

Jesús A. Pérez-Cabello<sup>#</sup>, Lucía Silvera-Carrasco<sup>#</sup>, Jaime M. Franco<sup>#</sup>, Vivian Capilla-González, Alexandros Armaos, María Gómez-Lima, Raquel García-García, Xin Wen Yap, M. Magdalena Leal-Lasarte, Deepti Lall, Robert H. Baloh, Salvador Martínez, Yoshihiko Miyata, Gian G. Tartaglia, Ritwick Sawarkar, Mario García-Dominguez, David Pozo, Cintia Roodveldt\*

\*Corresponding author: Cintia Roodveldt  
[cintia.roodveldt@cabimer.es](mailto:cintia.roodveldt@cabimer.es)

#### This PDF file includes:

- Figures S1 to S7
- Supporting Materials and Methods
- Supporting References
- Tables S1 to S3
- Legends for Datasets S1 to S12

#### Other supporting materials for this manuscript include the following:

- Datasets S1 to S12
- GEO repository (RNA-Seq) datasets: GSE233569, GSE233719, and GSE234160.

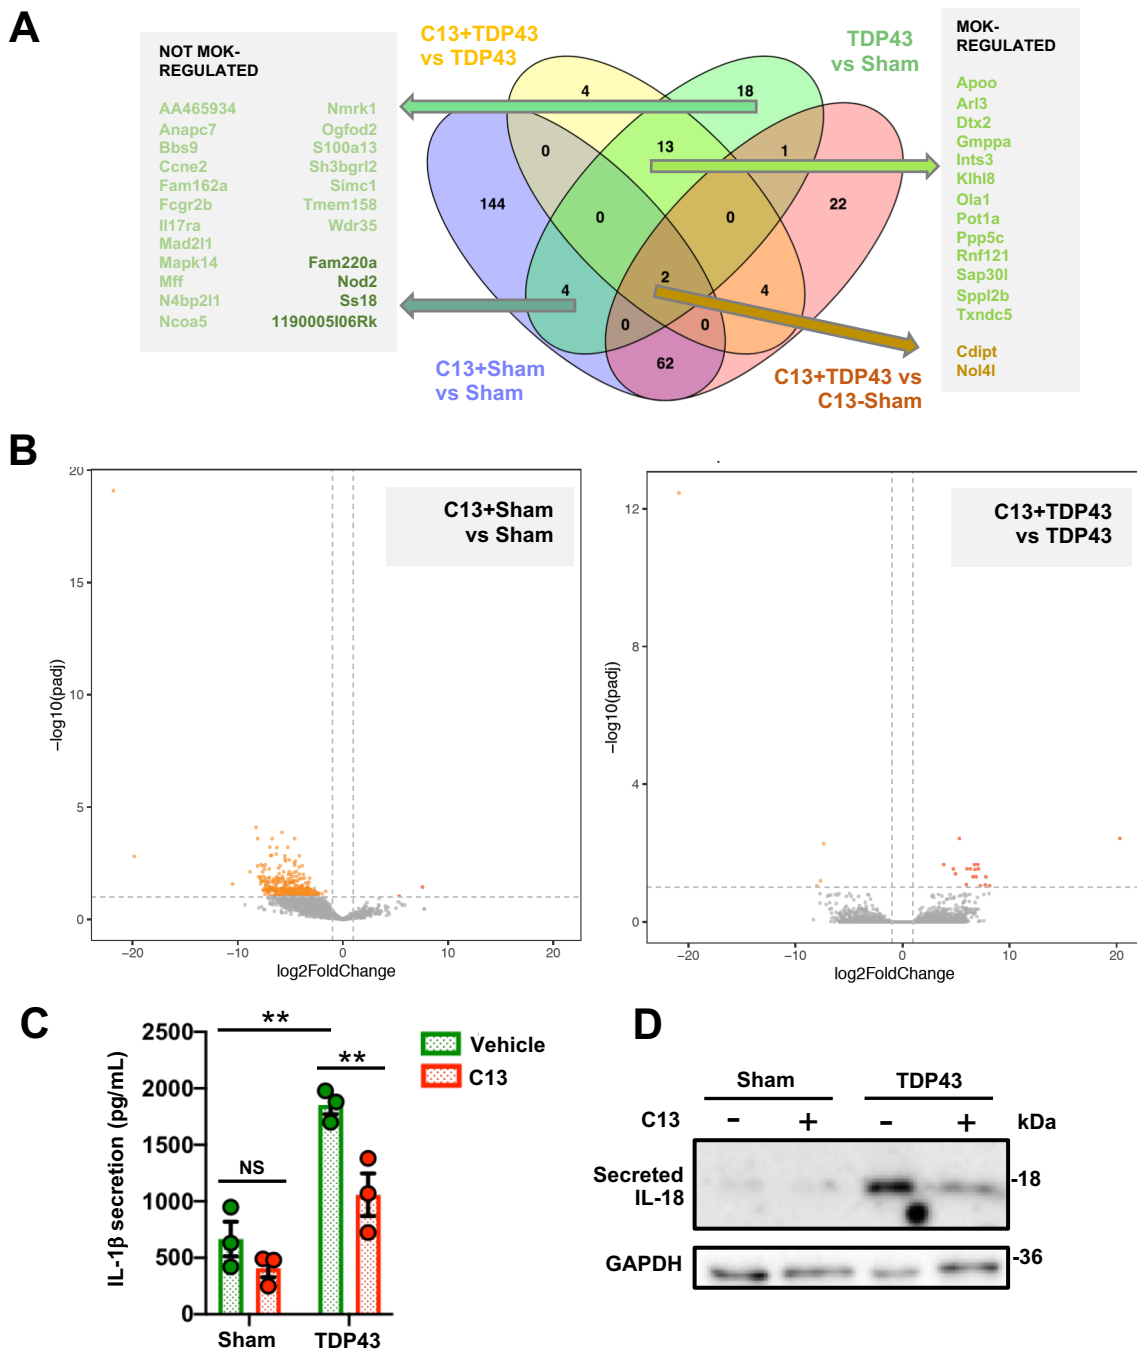

**Supplem. Figure 1: A)** Venn diagrams (created with Venny's [1]) showing the number of DEGs from analyzed SLAM-Seq data obtained with SIM-A9 cells exposed to 5  $\mu\text{g/mL}$  TDP-43 aggregates (TDP43) or sham aggregates (Sham) for 4 h, pre-treated for 1 h with 10  $\mu\text{M}$  C13 or DMSO (vehicle). Results are from three independent experiments (N=3). Indicated are the number of DEGs for 'C13+Sham vs. Sham' and 'C13+TDP43 vs. C13+Sham' comparisons ( $p_{\text{Adj.}} < 0.05$ ) and for the 'TDP43 vs. Sham' and 'C13+TDP43 vs. TDP43' comparisons ( $p_{\text{Adj.}} < 0.1$ ). Lists of DEGs for 'not MOK-regulated' (left) and 'MOK-regulated' DEGs within those genes that change upon exposure to TDP-43 aggregates. **B)** Volcano plots representing the identified DEGs (with  $p_{\text{Adj.}} < 0.05$ ) for 'C13-Sham vs. Sham' (left) and 'C13+TDP43 vs. TDP43' (right). **C, D)** Determination of IL-1 $\beta$  by ELISA (N=3) (**C**) and IL-18 by Western blot (representative image of two experiments) (**D**) from primary microglial cells stimulated with 5  $\mu\text{g/mL}$  TDP-43 aggregates (TDP43) or sham aggregates (Sham) overnight, pre-treated for 1 h with 10  $\mu\text{M}$  C13 or DMSO (vehicle). Data are mean  $\pm$  S.E.M. Student's t-test between shown groups, unpaired, one-tailed. \*\* $P < 0.01$ , NS: not significant.

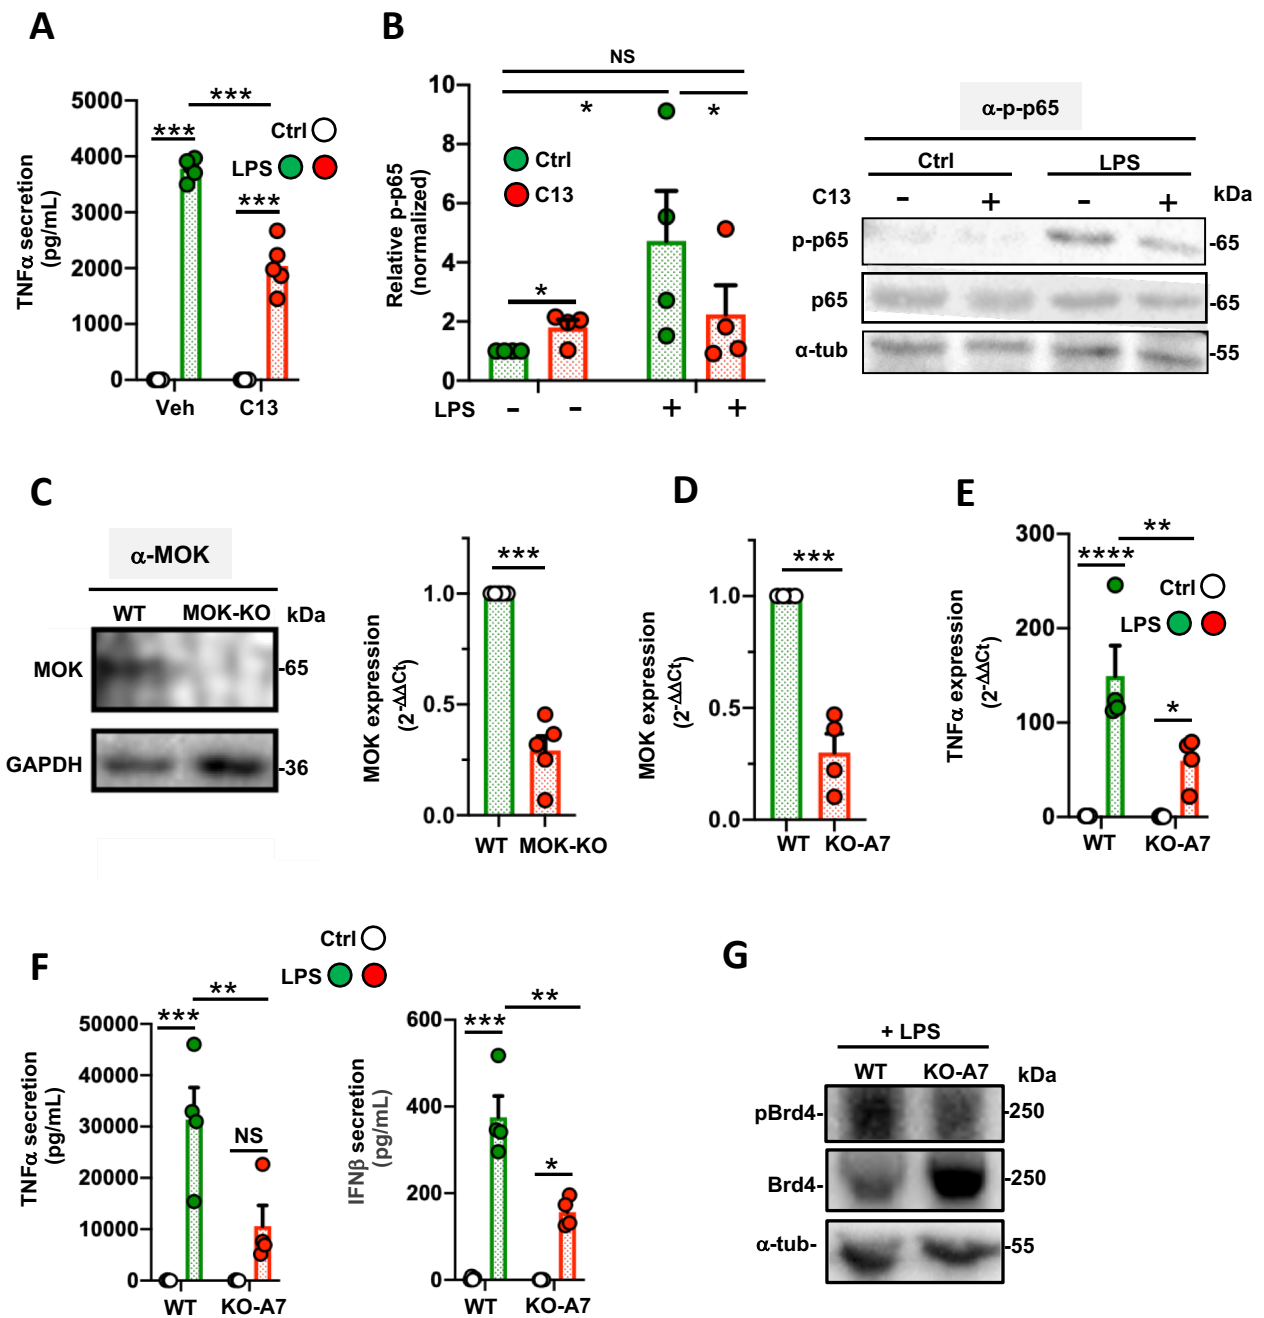

**Supplement. Figure 2: A)** Determination of TNF $\alpha$  secretion after stimulation of SIM-A9 cells with 1  $\mu$ g/mL LPS for 5 h, pre-treated with 10  $\mu$ M C13 (or vehicle) for 1 h. **B)** Quantification by band densitometry and representative image of Western blot assays using cell lysates from SIM-A9 cells stimulated or not with 1  $\mu$ g/mL LPS for 5 h, and pre-treatment with 10  $\mu$ M C13 (or DMSO) for 1 h, with anti-phospho-p65 (p-p65) and anti-p65 antibodies. Data represent means  $\pm$  S.E.M. normalized to untreated control (N=4). Student's t-test between shown groups, ratio-paired, two-tailed. **C)** Assessment of MOK expression in WT SIM-A9 cells and CRISPR/Cas9-generated MOK-KO clones by Western blot (left) and qRT-PCR (right). A band of ca. 65 kDa MW, in agreement with previously reported for brain tissue (34), was observed in WT and not in MOK-KO cells. **D)** Assessment of MOK expression in WT SIM-A9 cells and MOK-KO A7 clone (KO-A7) by qRT-PCR. **E,F)** Determination of cytokine expression after stimulation with 1  $\mu$ g/mL LPS for 5 h by qRT-PCR (**E**) or by ELISA (**F**) in KO-A7 cell clone. **G)** Representative image of Western blot assay from two independent experiments, using anti-pBrd4, anti-Brd4 or anti- $\alpha$ -tubulin, with lysates of WT and KO-A7 cells stimulated with 1  $\mu$ g/mL LPS for 1 h.

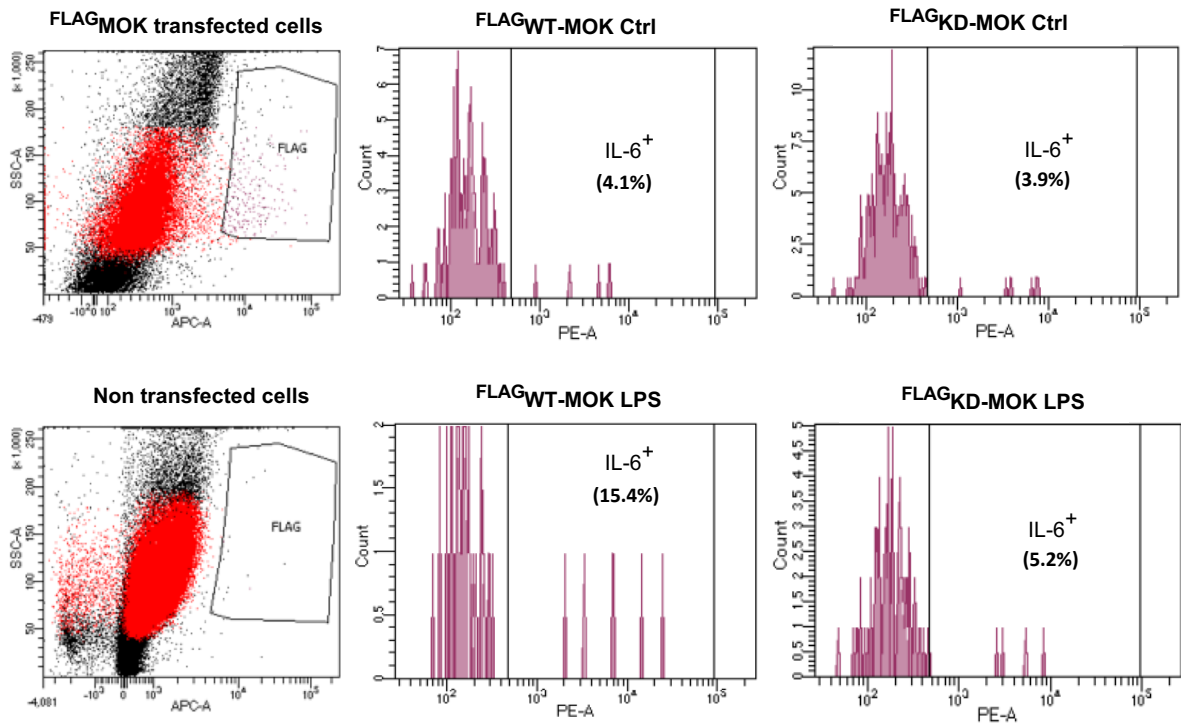

**Supplem. Figure 3:** Flow cytometry analyses for IL-6 expression (with PE-anti-IL-6 antibody) of MOK-KO cells transfected with  $_{FLAG}$ WT-MOK or  $_{FLAG}$ KD-MOK, stimulated or not with 1  $\mu$ g/mL LPS. Histograms show the  $_{FLAG}^{+}$  cell population (detected with APC-anti-FLAG antibody), gated for the region shown in the dot plots.

**A**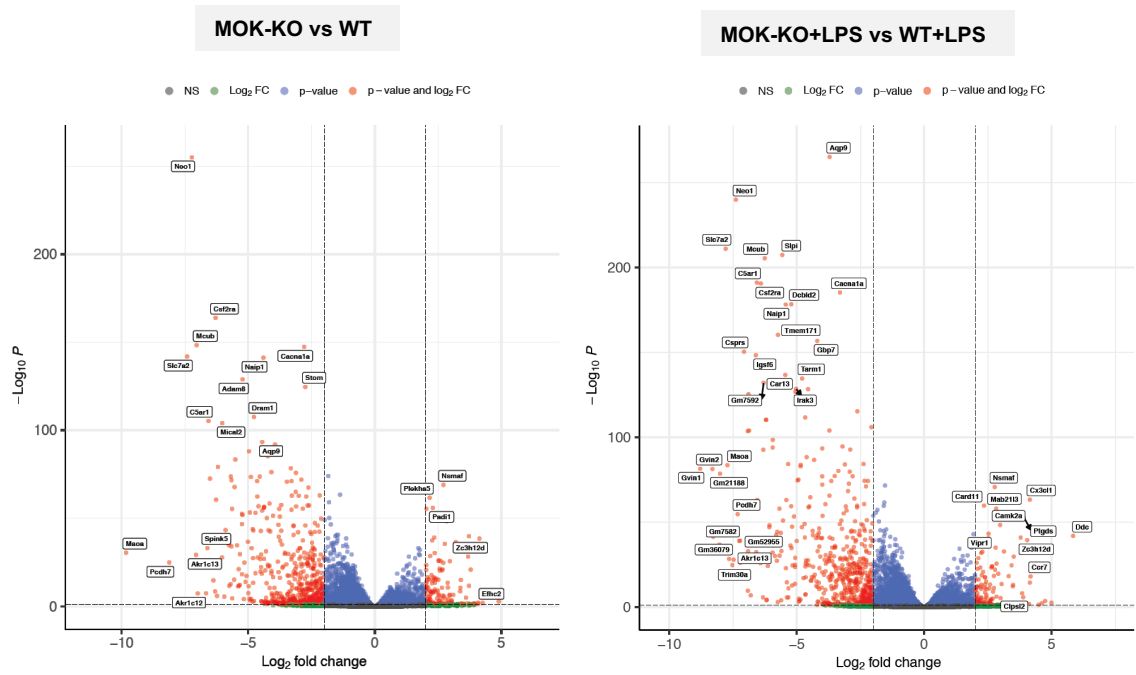**B**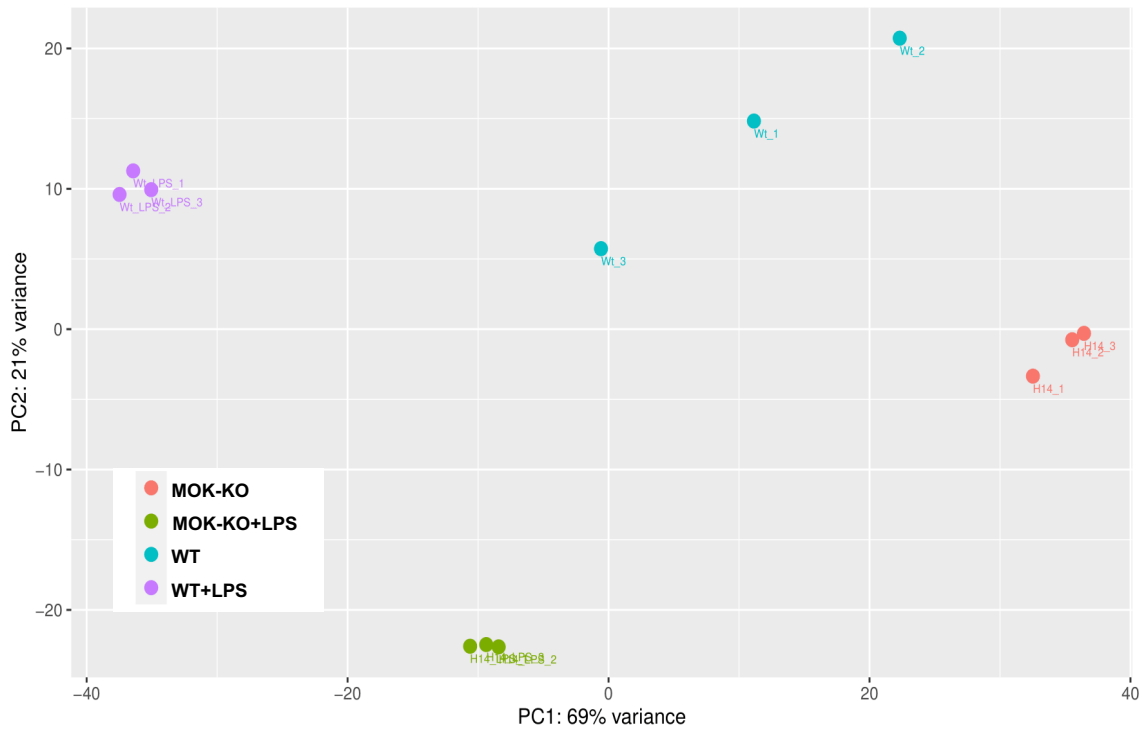

**Supplem. Figure 4:** RNA-Seq analysis from MOK-KO and WT SIM-A9 cells incubated (or not) with 1  $\mu$ g/mL LPS for 5 h. **A)** Volcano plots representing all 45661 identified genes for MOK-KO vs. WT in the absence (left) and presence (right) of LPS-stimulation.  $p_{Adj} < 0.05$  was considered significant. A few DEGs with the lowest p-values and largest fold-changes are labeled. **B)** PCA plot of RNA-Seq results (shown in Figure 3). Data are from three independent experiments (N=3).

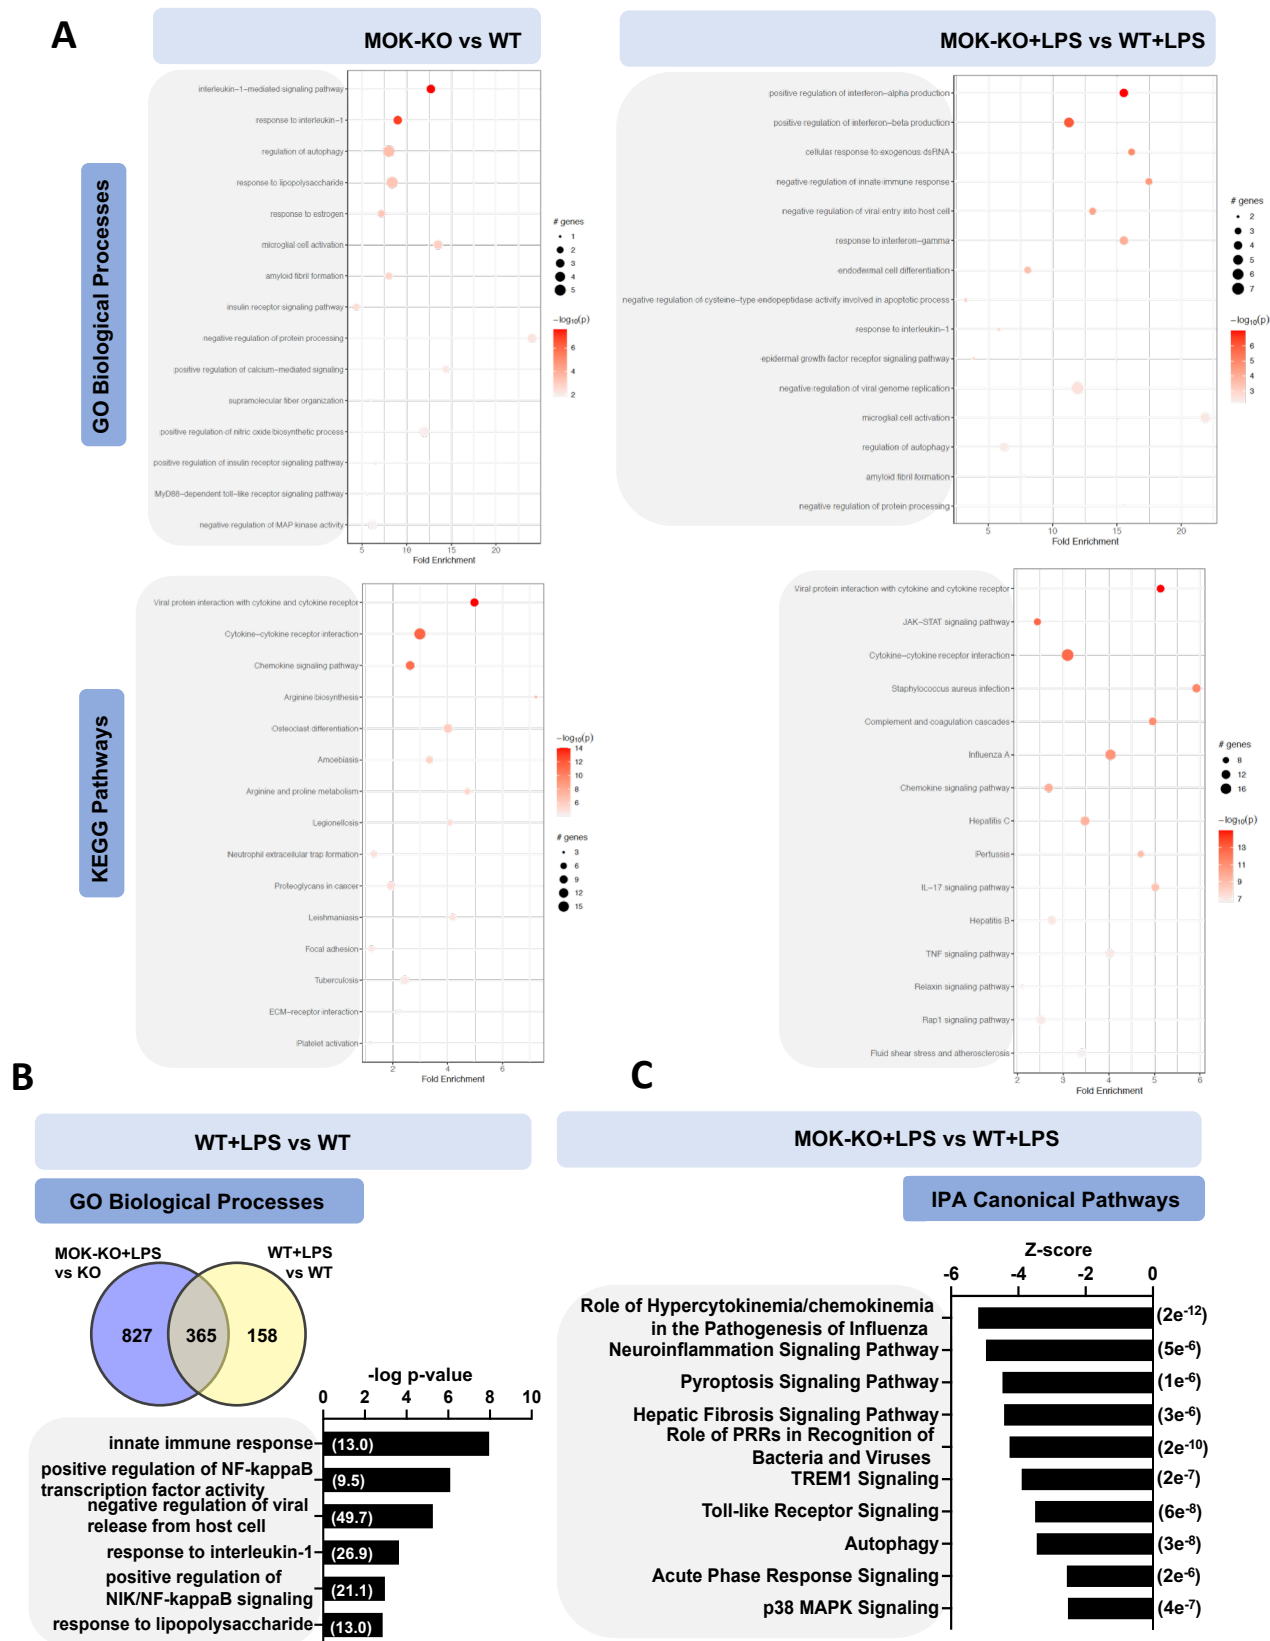

**Supplem. Figure 5:** RNA-Seq analysis from MOK-KO and WT SIM-A9 cells incubated (or not) with 1  $\mu\text{g}/\text{mL}$  LPS for 5 h. Results are from three independent experiments (N=3). **A**) Top-15 enriched terms of GO 'biological processes' and KEGG pathway enrichment analyses performed using PathfindR (v1.6.2) by using all DEGs after applying the filter on Log2 fold-change values at  $\pm 2$  along with  $p_{\text{Adj}} < 0.05$  as input. **B**) Top GO 'biological process' enriched terms between WT+LPS vs. WT from the 985 protein-coding DEGs which are not common to both groups (Venn diagrams, 827+158). Fold-enrichments are shown in parentheses. Shown are the top hits based on p-value with at least three up/downregulated genes. **C**) Top 10 IPA-identified pathways based on p-value (shown in parentheses) that were differentially regulated (in any comparison with  $p_{\text{Adj}} < e^{-5}$ ) in MOK-KO +LPS compared to WT +LPS.

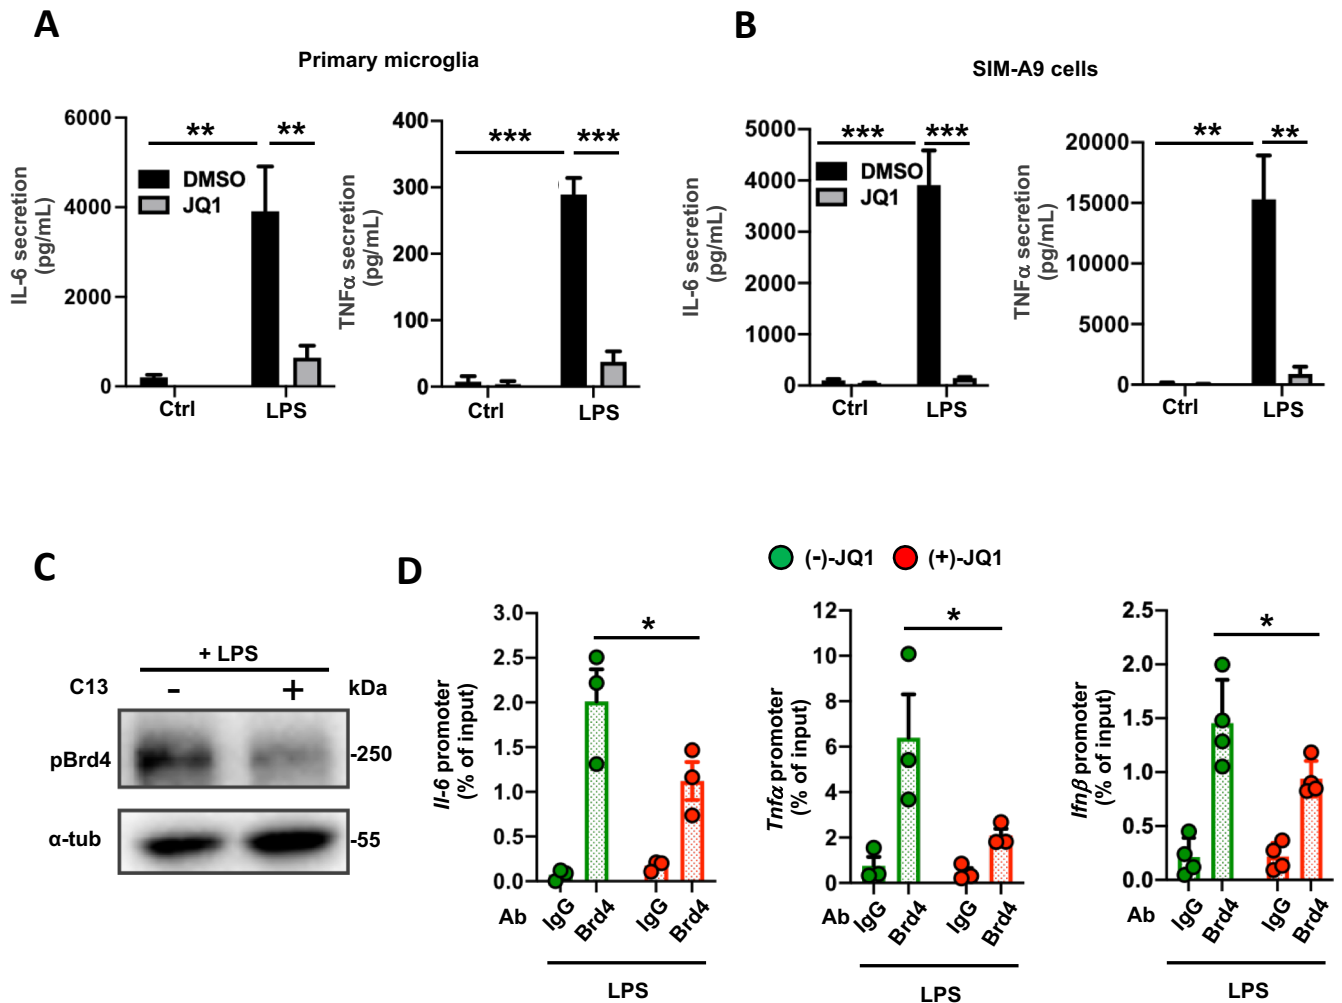

**Supplem. Figure 6.** Quantification of IL-6 and TNF $\alpha$  secretion by ELISA in supernatants from primary microglial **(A)** and SIM-A9 **(B)** cells pre-treated with 10  $\mu$ M (+)-JQ1 (or DMSO) for 1 h and stimulated with 1  $\mu$ g/mL LPS for 5 h (N=3). \*P<0.05, \*\*P<0.01, \*\*\*P<0.001. One-way ANOVA followed by Tukey post-hoc test. **(C)** Western blot with cell lysates from 1  $\mu$ g/mL LPS-stimulated WT SIM-A9 cells pre-treated or not with C13 (10  $\mu$ g/mL, 1 h), using anti-pBrd4 or anti- $\alpha$ -tubulin antibody, as indicated. A representative image of two independent experiments is shown. **(D)** ChIP-PCR assays from LPS-stimulated (1  $\mu$ g/mL LPS, 1 h) WT SIM-A9 cells pre-treated with 10  $\mu$ M (+)-JQ1 or (-)-JQ1 for 1h. Represented data are relative values (percentage of input) of PCR products for *Il6*, *Ifnb1* and *Tnfa* promoters after ChIP assay with either anti-Brd4 or IgG (control) antibodies. Student's t-test, unpaired, one-tailed. Data represent the mean percentages of input from 3 independent experiments (N=3) and error bars denote S.E.M.



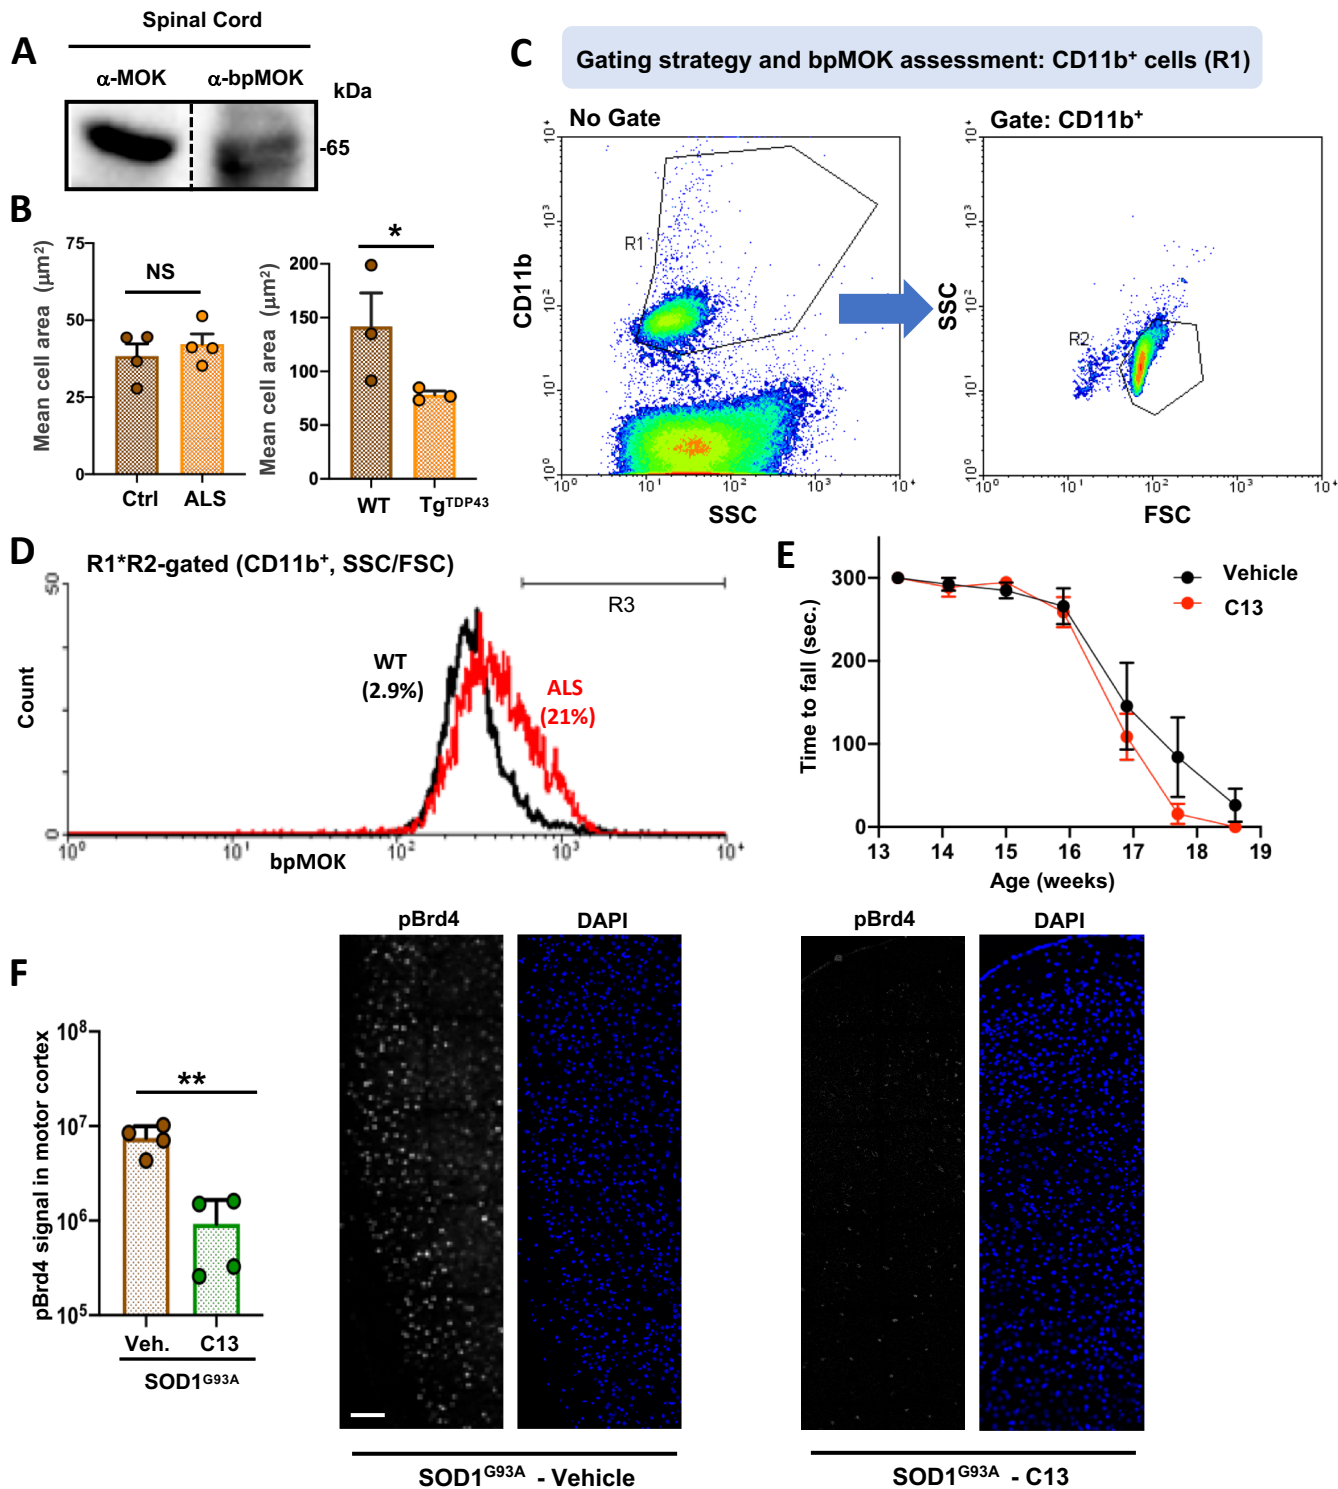

**Supplem. Figure 7. A)** WB of spinal cord tissue homogenates, blotted against anti-MOK or anti-bpMOK as indicated. **B)** Determination of cell size distribution by IHC analysis (with anti-bpMOK) of spinal cord tissue samples from Tg<sup>TDP43</sup> vs. WT mice (late stage; N=3) and from sporadic ALS patients vs. control subjects (N=4). Student's t-test, unpaired, one-tailed. **C,D)** Ficoll gradient-purified cells from 14-week old WT and SOD1<sup>G93A</sup> mouse spinal cords were immunolabeled with anti-CD11b and anti-bpMOK, and analyzed by flow cytometry with the gating strategy shown in **(C)**. The histograms shown for bpMOK fluorescence analysis of R1\*R2-gated (CD11b + SSC/FSC) cells correspond to one representative WT mouse (black) and one representative SOD1<sup>G93A</sup> mouse **(D)**. **E)** Motor performance assessment by rotarod test was carried out regularly since week 13 up to each mouse's end-point. Mean values and SEM are represented (N=6). Student's t-test, unpaired, one-tailed. **F)** Quantification of pBrd4 levels (integrated density of reconstructed region of interest with LasX 'Mosaic merge' tool) by IF with anti-pBrd4 of brain motor cortex from SOD1<sup>G93A</sup> mice after C13- or vehicle-treatment (week 15; 4 mice per experimental group, N=4, left). Representative, mosaic-merged IF images with DAPI counterstaining are shown (right). Scale bar: 100 µm. Student's t-test, unpaired, two-tailed. Data represent mean +/-S.E.M.



## Supplemental Materials and Methods

**General reagents and DNA constructs.** Lipopolysaccharide (LPS) from *Escherichia coli* (L3137, Sigma-Aldrich), (-)-JQ1 (SML1525, Sigma-Aldrich), (+)-JQ1 (SML1524, Sigma-Aldrich), polymixin B solution (81271, Merck Life Science S.L.) and dimethyl sulfoxide (DMSO, D2650, Sigma-Aldrich) were used. Compound AG2P145D/Comp13 (C13) was synthesized and characterized as previously reported (2). Plasmids encoding FLAG-tagged MOK (murine, wild type/WT and kinase-dead/KD) were described previously (3).

**Animal models.** For IHC studies, spinal cord tissue slices (lumbar, sacral) were from late-stage Prp-TDP43<sup>A315T</sup> mice (Tg<sup>TDP43</sup>), an ALS/FTD model described previously (4), and wild-type, age-matched controls. For all the remaining studies, transgenic B6SJL-TgN(SOD1-G93A) 1Gur/J (Jackson Laboratory, USA) male mice carrying the human SOD1 gene with the G93A point mutation (SOD1<sup>G93A</sup>) (5) and non-transgenic littermate ('WT') counterpart mice were used. They were maintained at CABIMER animal facility on a 12-hour light/dark cycle, housed at 4-8 animals/cage with constant temperature (22 °C) and humidity (60%), and with food and water available *ad libitum*. Genotyping to assess mutant SOD1 copy number was performed for every mouse used in experiments. At time of weaning, littermates were identified through ear punching and separated in different cages according to their gender. The ear tissue extracted during the tagging procedure was then used to run a qRT-PCR for genotyping of the progeny. Animals were anesthetized intraperitoneally by injection of ketamine (100 mg/kg body weight) and xylazine (10 mg/kg body weight). Experiments followed the approved institutional animal protocols at the CABIMER institute for the care and use of laboratory animals, with ethical committee numbers 25-2010 and 02-2016 and complied with national and European Union legislation (Spanish RD 53/2013 and EU Directive 2010/63) for the protection of animals used for scientific purposes.

**Administration of C13 to SOD1<sup>G93A</sup> mice and phenotype monitoring.** Each mouse was injected intraperitoneally every other day with a total of 100 µl solution consisting of either 20 µg of C13 compound in PBS or vehicle control containing 2% DMSO, for a total of three weeks starting at 11 weeks of age. Mice were weighed and tested in rotarod twice a week. At the end of treatment, a number of mice from each group were sacrificed and their spinal cord and brain were removed for microglial cell isolation followed by CD11b assessment by flow cytometry and for pBrd4 analysis by IF, respectively. The remaining mice continued to be assessed by rotarod and weighed regularly until they reached 80% of their maximum weight, at which point they were sacrificed.

**Human samples.** Patients spinal cord samples were obtained after voluntary donation to the Brain Bank of the Region of Murcia (BCRM) by patients diagnosed as sporadic ALS. Control spinal samples from subjects with no history of neurological diseases were donated by the BCRM. The sample collection at BCRM fulfils the ethical standards of our institutions: IMIB-Arrixaca and ISCIII National Biobank Network Review Boards

approved the protocol (anonymization/custody/conservation in control samples and custody/conservation in patient's samples), which was required for Clinical Trial approval (NCT00124539, EudraCT 2006-00309612), as well as the 1964 Helsinki declaration and its later amendments or comparable ethical standards. Prior to the spinal cord extraction, *in situ* exploration was performed to detect possible anatomical malformations. Transverse serial segments of 1.0 cm were embedded in paraffin, cut at 7  $\mu$ m and mounted in 10 parallel series for IHC immunolabeling.

**MOK-knockout cells.** MOK-knockout (MOK-KO) SIM-A9 cell clones (H14 and A7) were generated by CRISPR/Cas9 technology (Synthego, Redwood City, CA, USA). Quality control of MOK-KO clones was done by Synthego. The expected mutations were confirmed by Sanger DNA sequencing (Genomics Unit, CNIO, Madrid) and clones were validated by MOK-specific qRT-PCR and Western blot by us, as shown in Supplem. Figure 2c,d.

**Cell culture preparation.** Mixed glial cultures were prepared from cerebral cortices of 1-3 days-old C57BL/6 male mice (University of Seville Animal Core Facility), and microglia were isolated by mild trypsinization as previously described (6). After microglia isolation, cells were detached with accutase (A11105, Thermo Fisher Scientific) and seeded in 24-well plates at a density of 100,000 cells/mL. Attached microglia were allowed to recover in conditioned medium (half new culture medium, half mixed microglia-used culture medium) for 48 h before being subjected to different treatments. SIM-A9 microglial cell line (CRL-3265) was acquired from ATCC. SIM-A9 WT cells and MOK-KO clones were maintained in DMEM-F12 (Sigma-Aldrich) that was supplemented with heat-inactivated 10% FBS and 5% HS (Gibco, Billings, MT, USA), 2 mM L-glutamine (Thermo Fisher Scientific), 100 U/ml penicillin (Thermo Fisher Scientific) and 100  $\mu$ g/ml streptomycin (Thermo Fisher Scientific).

**Treatment of cell cultures with LPS.** Stimulation of primary or SIM-A9 microglial cultures with LPS was performed by adding one tenth volume of medium alone or containing either LPS (1  $\mu$ g/mL final) and incubated for either 1, 5 or 16 h, as indicated. Pre-treatment with 10  $\mu$ M C13 or 10  $\mu$ M (-)-JQ1/(+)-JQ1 was done in the same manner by incubating cells for 1 h prior to cell treatment. In these cases, control cultures received equal volume of DMSO in medium (vehicle). After incubation at 37°C, supernatants were harvested, clarified by mild centrifugation and stored at -20°C, and cells were either used for different purposes or frozen and stored at -20°C. For cell treatment with TDP-43 aggregates for SLAM-Seq analysis, see below.

**Preparation of TDP-43 aggregates and treatment of cell cultures.** TDP-43 and sham aggregates were obtained by purifying the inclusion body fraction after overexpression of His<sub>6</sub>-human TDP-43 fusion protein (by using a plasmid construct kindly provided by Yoshiaki Furukawa's laboratory, Keio University, Yokohama, Japan), or empty vector, in *E. coli* BL21(DE3) cells as previously described (6, 7, 8). General characterization of

the *in vitro*-prepared TDP-43 aggregates was done as before (6). SIM-A9 or primary microglial cells in culture were pre-treated with 10  $\mu$ M final C13 or DMSO for 1 h and then to 5  $\mu$ g/mL TDP-43 or sham aggregates in medium containing polymyxin B (10  $\mu$ g/mL) 5 h or overnight. Culture supernatants were harvested for IL-1 $\beta$  and IL-18 quantification by ELISA and Western blot, respectively, and cells were lysed for GAPDH assessment by Western blot.

### **Motor neuron culture, treatment and analysis**

Motor neuron cultures were prepared from embryonic 12.5-day spinal cords. Embryos were obtained from Friend leukaemia virus B (FVB) mice (University of Seville-Centro de Experimentacion Animal Oscar Pintado). Dissection of the spinal cord from embryonic (E12.5) was followed by the separation of neurons from the spinal cord tissue through mechanical and enzymatic cleavage as described (9) with modifications. Briefly, spinal cords were dissected and meninges removed. Isolated spinal cords were transferred to ice cold GHEBS buffer (137 mM NaCl, 2.7 mM KCl, 22.2 mM glucose, 25 mM HEPES buffer, pH 7.4, 20 IU/mL penicillin, 20  $\mu$ g/mL streptomycin) and fragmented. Spinal cord fragments were washed with HEPES buffer solution (137 mM NaCl, 2 mM KCl, 25 mM glucose, 25 mM HEPES buffer, pH 7.4, and 20 IU/mL penicillin plus 20 mg/mL streptomycin) and digested with 0.025% trypsin-EDTA (GIBCO) for 10 min at 37°C. After digestion, spinal cords were subjected to mechanical disaggregation by shaking in Leibowitz's L15 media (Thermo Fisher Scientific) containing 0.1 mg/mL DNase (Sigma-Aldrich). Additional disaggregation was carried out by careful pipetting samples in order to obtain a dispersion at single-cell level. Cells were purified after a 4% BSA gradient (Thermo Fisher Scientific) by centrifugation at 180 g for 5 min and resuspended in Leibowitz's 15 media. Next, cells were carefully layer over OptiPrep 1.320 gradient (PhotoGenix, Cat. 1114542) diluted with 50% of GHEBS buffer and centrifugated at 520 g for 10 min. Collected motor neurons were cultured in neurobasal medium (Thermo Fisher Scientific) supplemented with 2% (v/v) B27 complement, 2% (v/v) heat inactive horse serum, 125 nM L-glutamine, 50  $\mu$ M beta-mercaptoethanol and 10 ng/mL of CNTF, GDNF, BDNF and HGF. All factors were purchased from Peprotech (London, UK). The motor neuron culture media was changed every 48 hours, experimental conditions were carried out at day 5 of culture. Motor neurons were treated for 24h in the presence of 50% (v/v) conditional media from LPS-stimulated WT and MOK-KO cells. In order to evaluate survival and measure cytotoxicity, a high throughput screening was carried out by using an Imagexpress micro system and MetaXpress equipment with a LIVE/DEAD Viability/Cytotoxicity assay for animal cells (Molecular Probes/ThermoFisher Scientific).

**Organotypic culture preparation and treatment.** Organotypic cultures were prepared as previously described (6) from lumbar spinal cords of 5-week-old male SOD1<sup>G93A</sup> or non-transgenic littermates (WT) mice. Cultures were maintained at 37°C in a 5% CO<sub>2</sub>/95% air humidified environment. Cultures were left to stabilize for 4 days, then medium was changed every 3 days. After 1 week, treatments were performed by adding one tenth volume of fresh medium containing LPS (1  $\mu$ g/mL) or medium alone. After

overnight incubation, supernatants were harvested and significantly upregulated IL-6 cytokine levels were confirmed by ELISA in all LPS-treated cultures as a stimulation check-up. In addition, organotypic cultures were processed for immunofluorescence analyses.

**Acute microglial cell isolation from adult mice.** Microglial cells from adult mice were acutely isolated from spinal cord tissues of 14 weeks-old mSOD1<sup>G93A</sup> Tg mice and their non-transgenic ('WT') littermates (N=8), or from C13- or vehicle-treated mSOD1<sup>G93A</sup> Tg mice (N=4) and their WT littermates (N=6), accordingly. Mice were anesthetized by intraperitoneal injection of a Ketamine/Xylazine mixture, and intracardially perfused with phosphate-buffer saline (PBS). Spinal cords were extracted by flushing the spinal canal with PBS and minced into 2-3 mm pieces with a disposable scalpel in ice-cold Hank's-balanced salt solutions (HBSS, cat. 14170-088). Each spinal cord microglial preparation was derived from a single animal by enzymatic digestion and mechanical disruption, and separation by density gradient, as detailed. Spinal cord fragments were dissociated with 0.25 % trypsin-EDTA for 10 min at 37 °C (GIBCO, cat. 25200072). Then trypsin treatment was stopped by adding RPMI 1640 medium (Sigma, cat. R8758) with 10% (v/v) FBS. The spinal fragments were then mechanically dissociated by repeated pipetting and by passing through a 70 µm cell strainer (Falcon cat. 352350s). Microglia was further purified for myelin removal by using Percoll gradient. Cells were collected by centrifugation at 350g for 10 min at 4 °C, the cell pellet resuspended in 2 ml of 70% isotonic Percoll, and then carefully overlaid with 3 mL of 35% Percoll in PBS, and 2 ml of PBS. The discontinuous gradients were centrifuged at 850 g for 35 min at room temperature. The upper layer containing the white in appearance myelin debris was then removed. Cells were isolated from the gradient interface, washed in three volumes of PBS by centrifugation at 500 g for 5 min, and resuspended in RPMI 1640 medium supplemented with 2% FBS for cell counting and flow cytometry analysis.

**Immunolabeling of acutely isolated microglial cells and flow cytometry analysis.** Cells were stained on ice for 30 min with rat anti-Cd11b-APC (BD Biosciences, cat. 553312) or appropriate antibody isotype controls Rat Anti-Mouse IgG1-PE (BD Biosciences, cat. 562027), diluted in PBS with 1% FBS and 1mM sodium azide. For intracellular labelling of bi-phosphorylated MOK protein (bpMOK), cells were fixed and permeabilized with the Cytotfix/Cytoperm Plus Fixation/Permeabilization Kit (BD Biosciences, cat. 554722) according to the manufacturer instructions and stained with anti-bpMOK antibody (pThr159+pTyr161, StressMarq, cat. SPC-1030; see Table S1 for antibody information), followed by donkey anti-rabbit IgG-Alexa Fluor 488 (Invitrogen, cat. A-21206). Antibodies for intracellular labelling were diluted in Perm/wash Buffer (BD Biosciences, cat. 554723). Samples were analysed using a FACSCalibur (BD Biosciences, Madrid, Spain). Data were analysed using either Cell Quest Software (Becton Dickinson, Mountain View, CA, USA) or the WinMDI 2.8 software (from <http://www.cyto.purdue.edu/flowcyt/software/Winmdi.htm>).

**Immunohistochemistry (IHC) and IHC analyses.** IHC assays and quantification were double blinded. Fixed spinal cord segments from Tg<sup>TDP-43</sup> and control mice and controls (lumbar region) or human sporadic ALS patients (with no known mutations, lower thoracic or higher lumbar region and obtained as explained before), were embedded in paraffin and sectioned to 10  $\mu\text{m}$ -thick slices. After deparaffinization, sections were incubated with 1x citrate buffer (Cat. C9999, Sigma Aldrich) for 30 min at 95 °C for antigen retrieval, followed by incubation in 3% (w/v) H<sub>2</sub>O<sub>2</sub> to inhibit endogenous peroxidase activity. Sections were then incubated with 1% Bovine Serum Albumin (BSA) blocking solution for 1 h at room temperature, followed by overnight incubation at 4 °C with anti-bpMOK antibody (pThr159+pTyr161, StressMarq, cat. SPC-1030). Then, sections were washed and incubated with the appropriate secondary biotinylated antibodies, followed by incubation with the avidin-biotin complex (Vectastain ABC-HRP Kit, Peroxidase-Rabbit IgG; Vector Laboratories, USA). Finally, sections were treated with diaminobenzidine-nickel substrate (DAB-nickel; Vector Laboratories) and then examined under a Leica DM6000B microscope. Images were acquired at 40x magnification. For comparative signal quantification, cell size and signal intensity for at least 50 cells (with visible nucleus on the plane) from three or four different, non-overlapping fields were assessed for each sample (corresponding to each individual) with the Fiji software (OpenSource). The background intensity -determined from 5 regions from 4 different images- was subtracted from the calculated signal intensities. In human samples, the less abundant very large cells (>2000 pixels, corresponding to >110  $\mu\text{m}^2$ ) were excluded from the analysis. The mean intensity per cell and the intensity per cell area were calculated from all analysed cells for each sample/individual.

**Immunofluorescence (IF) of cultured cells.** For IF analyses, SIM-A9 cells or highly pure primary microglial cultures obtained as described above were used. Primary cell cultures were seeded on pre-treated poly-D-Lys (Sigma-Aldrich) cover glasses. For the immunolabeling step, treated microglial cultures were fixed in cold PBS that contained 4% paraformaldehyde (Sigma-Aldrich) for 20 min at 4°C. After washing with PBS, cells were incubated with PBS that contained 0.5% (v/v) Triton X-100 (Sigma-Aldrich) and 3% bovine serum albumin (Sigma-Aldrich) for 1 h at 4 °C, for blocking and permeabilization. Cells were incubated overnight at 4 °C with Phospho-Brd4 (Millipore, Cat. ABE1451) primary antibodies (1:500). After washing with PBS, cells were incubated for 1 h at room temperature with their corresponding conjugated secondary antibodies, which was Alexa-Fluor488 donkey anti-rabbit IgG (Thermo Fisher, Cat. A-21206) (1:1000). After washes with PBS, nuclei were counterstained by incubating cells with PBS that contained 1  $\mu\text{g}/\text{mL}$  DAPI (Sigma-Aldrich, Cat. D9542) for 15 min at room temperature. Fluorescence images were captured with confocal automated inverted microscope (Confocal Laser Scanning Microscope TCS SP5; Leica Microsystems). Images were taken at 63x magnification from randomly chosen fields.

**Immunofluorescence (IF) of spinal organotypic culture and brain slices.** Following treatment with LPS (or medium alone), spinal cord organotypic slices were fixed with 4% paraformaldehyde in PBS for 3 h at 4 °C. After blocking with 5% normal donkey

serum (Merck Millipore) and 0.5% (v/v) Triton X-100 in PBS, sections were incubated with anti-bpMOK (pThr159+pTyr161, StressMarq, Cat. SPC-1030) or anti-pBrd4 (Phospho-Brd4, Millipore, Cat. ABE1451) antibodies from rabbit. Slices were thoroughly washed in PBS with 0.2% Tween-20 and incubated with Alexa-Fluor 488-labeled donkey anti-rabbit IgG secondary antibody (1:1000; Thermo Fisher Scientific) diluted in PBS with 0.1% Triton X-100 and 1% of normal donkey serum for 2 h at room temperature. Finally, cell nuclei were labelled with 1 µg/ml DAPI for 15 min in PBS and sections were mounted with Vectashield medium (Vector Laboratories, Burlingame, CA, USA). Slices were analysed under confocal microscope (Confocal Laser Scanning Microscope TCS SP5; Leica Microsystems).

Removed murine brains were embedded in paraffin, stored at 4 °C and then sectioned to 7 µm-thick slices. After deparaffinization, sections were incubated with 1x citrate buffer (Sigma Aldrich, Cat. C9999) for 30 min at 95 °C for antigen retrieval, and washed three times with 0,1% (v/v) Triton in PBS (PBS-triton) during 5 minutes, followed by incubation in 3% (w/v) H<sub>2</sub>O<sub>2</sub> to inhibit endogenous peroxidase activity. Sections were then incubated with 1% BSA and 3% normal donkey serum diluted in PBS-triton (blocking solution) for 1 h at room temperature and were stained overnight at 4 °C with Phospho-Brd4 (Millipore, Cat. ABE1451) primary antibodies (1:100) diluted in blocking solution. After washing with PBS-triton, cells were incubated for 1 h at room temperature with their corresponding conjugated secondary antibodies diluted in blocking solution, which was Alexa-Fluor546 donkey anti-rabbit IgG (Thermo Fisher, Cat. A-10040) (1:500). After washes with PBS-triton, nuclei were counterstained by incubating cells with blocking solution that contained 1 µg/mL DAPI (Sigma-Aldrich, Cat. D9542) for 30 min at room temperature and sections were mounted with Vectashield medium (Vector Laboratories). Fluorescence images of complete brain slices were captured with Thunder automated inverted microscope (DMi8 S; Leica Microsystems) at 40x magnification and the Individual images were stitched together with the 'Mosaic merge' algorithm of LasX Software. For (blinded) quantification, the same region of interest (ROI) belonging to the motor cortex of the brains was manually selected. ImageJ software was used to measure the integrated density of the fluorescence of these ROIs.

**Cytokines determination by ELISA.** Primary microglia or SIM-A9 cell cultures were stimulated as described before. Harvested culture supernatants were centrifuged at 400 g for 5 min, and cell-cleared supernatants were recovered and stored at -20 °C before cytokine measurement. IL-6 and TNFα levels were assayed with Mouse IL-6 and TNF-α BD OptEIA ELISA sets (BD Biosciences, Cat. 555240 and 555268, respectively). IFN-β and IL-1α were assayed with Mouse IFN-β and IL-1α/IL-1F1 DuoSet ELISA kits (R&D Systems, Cat. DY8234 and DY400, respectively). All cytokine quantifications were done by following the manufacturer's protocol.

**Transfection of SIM-A9 microglial cells.** For the overexpression of FLAG-tagged WT-MOK and KD-MOK constructs in SIM-A9 cells, Glial Mag transfection reagent (OzBiosciences, Cat. KGL0250) was used. The protocol was carried out according to

manufacturer's instructions. Plasmids were diluted in Optimem medium (Gibco, Cat. 31985062), and 1  $\mu$ L of Glial Mag and 0.5  $\mu$ g of plasmid were employed and volumes and concentrations were optimized for a 24-well plate assay. Transfection time was of 30 h in total, including a 5 h-stimulation with or without 1 $\mu$ g/mL LPS and GolgiStop (BD Biosciences, Cat. 554724).

**Immunolabelling and flow cytometry of transfected cells.** SIM-A9 cells were fixed and permeabilized for 20 min at 4 °C by using Fixation/Permeabilization solution (BD Biosciences, Cat. 555028). After washing twice with Wash Buffer (2 mM EDTA, 2% v/v FBS in PBS), cells were incubated for 15 min at room temperature in Perm/Wash Buffer (BD Biosciences, Cat. 555028). Immunostaining was performed using APC-conjugated anti-FLAG (Abcam, Cat. Ab72569) and PE-conjugated anti-IL-6 (BD Biosciences, Cat. AB395367) at a 1:40 dilution in both cases in Perm/Wash Buffer, and samples were incubated at 4 °C in the dark for 30 min. After antibody incubation, cells were washed twice with Perm/Wash Buffer and resuspended in Wash Buffer, and were kept at 4 °C in the dark until analyses with LSR Fortessa X-20 cytometer (BD Biosciences).

**Preparation of cell lysates for Western blot.** Cells were cultured in 12-well plates at 400,000 cells/mL for 24 h previous to treatment. After treating as required, cells were washed with cold PBS and lysed in lysis buffer (50 mM Tris pH 7.4, 150 mM NaCl, 0.25% deoxycholate, 10% glycerol, 0.1% SDS, 0.01% IGEPAL) containing Complete EDTA-free Protease inhibitor cocktail tablets (Roche, Cat. 11836170001), 1 mM PMSF (ITW Reagents, Cat. A0999) and PhosSTOP (Roche, Cat. 04906845001). Lysates were incubated for 5 min at 37 °C followed by a 20 min incubation in ice with manual agitation every 5 min. They were then centrifuged at 12,000 g for 5 min at 4 °C. Cleared supernatants were collected and stored at -20 °C until use. Protein concentration was determined using Micro BCA™ Protein Assay Kit (Thermo Fisher, Cat. 23235), following manufacturer's instructions.

**Western blot assays.** Equal volumes of cell lysate (20  $\mu$ l) with comparable protein content (40-50  $\mu$ g) were subjected to 10% or 12% SDS-PAGE electrophoresis and semi-dry or wet transfer to a 0.2  $\mu$ m nitrocellulose or PVDF membrane (Amersham, Cat. 10600006 and Amersham, Cat. 10600021, respectively). After blocking with 5% (w/v) non-fat milk in Tris-buffered saline with 0.05% Tween 20 (TBST) during 1h at room temperature (RT) and washings with TBST, membranes were incubated overnight at 4 °C with the corresponding primary antibodies against: (Ser492) Phospho-Brd4 (Millipore, Cat. ABE1451) (1:500), Brd4 (Bethyl, Cat. A301-985A100) (1:1000), MOK (Abxexa, Cat. abx129598) (1:1000), Ser536-Phospho-NF $\kappa$ B p65 (ThermoScientific, Cat. PA5-17782) (1:1000), p65 (Cell Signalling, Cat. 3034) (1:1000). The following day membranes were washed with TBST and incubated with the appropriate HRP-conjugated secondary antibody: goat anti-mouse IgG (Pierce, Cat. 32430) (1:2500) or goat anti-rabbit IgG (Pierce, Cat 31460) (1:10000), for 1 h at room temperature. Finally, after washings with TBST, the substrate solution ECL reagent (Merck Millipore, Cat. WBKLS0500) was



added and bands were detected using a ChemiDoc™ MP Imaging System (Bio-Rad, Cat. 1708280). The results were quantified using the ImageLab Software 6.1 and normalized against the housekeeping gene GAPDH (Millipore, Cat. MAB-374) (1:2500) or  $\alpha$ -tubulin (Sigma-Aldrich, Cat. T6199) (1:6500), accordingly.

**Cell lysate preparation and anti-phospho-Ser/Thr immunoprecipitation.** After treatment of primary microglial cells with TDP-43 or sham aggregates as described before, culture supernatants were harvested. Following two washes with PBS, cells were lysed with NP-40 lysis buffer (Invitrogen, FNN0021) supplemented with protease inhibitors cocktail (Roche), 1 mM PMSF (ITW Reagents, Cat. A0999) and PhosSTOP (Roche, Cat. 04906845001). For the IP procedure, Protein A Dynabeads (Invitrogen, Cat. 10001D) were used. After incubating the beads with 2  $\mu$ g of rabbit anti-phospho-Ser/Thr antibody (Abcam, Cat. ab17464) for 1 h at room temperature under rotation, crosslinking of the captured antibody was performed with BS3 (Thermo Fisher, Cat. 21580) according to the manufacturer's protocol. Afterwards, the beads-antibody conjugates were added to the cell lysates and incubated for 1 h at room temperature under rotation. After washing, elution was carried out with 50 mM glycine solution (pH 2.8) and the eluate was pH-equilibrated with PBS for subsequent LC-MS/MS analysis.

**LC-MS/MS and protein identification.** IP protein eluates were subjected to TCA/acetone precipitation and the pellet was resuspended in a solution of 0.2% RapiGest in 50 mM ammonium bicarbonate. DTT was added to 5 mM final concentration and incubated for 30 min at 60 °C. Afterwards, chloroacetamide was added to 10 mM final concentration and incubated for 30 min at room temperature in the dark. Trypsin digestion was done overnight at 37 °C at a 1:40 (trypsin:protein) ratio. The next day, trypsin was inactivated with formic acid and acetonitrile was added to a final concentration of 2%. Injection volume was 10  $\mu$ L per run.

LC-MS/MS analyses were done in a TOF (5600 Plus, Sciex) triple quadrupole equipped with a nano electrospray source coupled to a nanoHPLC Eksigent. Analyst TF 1.7 software was used for control of equipment and for the acquisition and processing of data. Peptides were first loaded in a 'trap column' (Acclaim PepMap 100 C18, 5  $\mu$ m, 100  $\text{\AA}$ , 100  $\mu$ m id  $\times$  20 mm, Thermo Fisher Scientific) in an isocratic manner in 0.1% formic acid/2% acetonitrile (V/V) at a 3  $\mu$ L/min flow for 10 min. Then, they were eluted in a reverse-phase analytical column (Acclaim PepMap 100 C18, 3  $\mu$ m, 100  $\text{\AA}$ , 75  $\mu$ m id  $\times$  150 mm, Thermo Fisher Scientific) coupled to a 'PicoTip emitter' (F360-20-10-N-20\_C12, New Objective). Peptides were eluted with a linear gradient of 2-35 % (v/v) solvent B in 60 min at a 300 nL/min flow. Solvents A and B were 0.1% formic acid (v/v) and acetonitrile with 0.1% formic acid (v/v), respectively. Source voltage was selected at 2600 V and heater temperature was maintained at 100 °C. Gas 1 was selected at 15 psi, gas 2 at zero, and curtain gas at 25 psi. For protein identification, acquisition was carried out with a Data Dependent Acquisition (DDA) method consisting of a TOF-MS with a sweep window of 400-1250 m/z, accumulation time of 250 ms, flowed by 50 MS/MS with a sweep window of 230-1500 m/z, accumulation time of 65 ms and a total cycle time of 3.54 s.

For protein identification, the ProteinPilot v5.0.1 (Sciex) software was used with a Paragon method, with trypsin as the enzyme and iodoacetamide (IAA) as the Cys alkylating agent, using the reference proteome of mouse (*mus musculus*) downloaded from uniprot.org (02/2021) in a FASTA format as the databank, fused with the Sciex contaminants. A false-positives analysis was done and proteins with FDR (False Discovery Rate) lower than 1% were selected.

**RNA isolation and cDNA synthesis for qRT-PCR.** Total RNA from SIM-A9 or primary microglial cells was extracted by using Primezol (Canvax, Cat. AN1100). Cells were directly lysed in 12-well culture plates by adding 1 mL of Primezol per well. Samples were incubated 5 min at room temperature and then 200  $\mu$ L of chloroform was added. Tubes were shaken vigorously by hand for 15 sec. and incubated 3 min at room temperature and then centrifuged at 12000 g for 15 min at 4 °C. The upper layer containing RNA was separated and transferred into a new tube without disturbing the interphase. RNA was precipitated by adding 0.5 mL of isopropyl alcohol and incubated for 10 min at room temperature. Tubes were centrifuged again at 12000 g for 10 min at 4 °C. Supernatant was removed and pellet was washed once with 70% ethanol. Finally, tubes were centrifuged at 7500 g for 5 min at 4 °C. Supernatant was removed once more and pellet was air-dried. Pellet was dissolved in RNase-free water and stored at -80 °C. After extraction, 1  $\mu$ g of RNA was reverse-transcribed by using PrimeScript RT reagent Kit (Takara, Cat. RR047Q) following the manufacturer's guidelines.

**qRT-PCR.** Quantitative real-time PCR (qRT-PCR) with template cDNA was performed by using iTaq Universal SYBR Green Supermix (Bio-Rad, Cat. 1725124) on a QuantStudio 5 Real-Time PCR System. Primers pairs (Sigma-Aldrich) were preferentially designed or selected to anneal in different exons and they were as follows: MOK, HPRT, IL-6, IFN $\beta$ , TNF $\alpha$ , IL-1 $\alpha$ , IRF7 (Table S3). Amplicons were analysed for 40 cycles by using an optimized qRT-PCR thermal profile. Changes in gene expression were determined by applying the formula  $2^{-\Delta\Delta Ct}$  where  $\Delta Ct$  is calculated taking HPRT as endogenous control.  $\Delta\Delta Ct$  values were calculated by subtracting the average  $\Delta Ct$  values obtained for non-treated cell samples.

**Chromatin immunoprecipitation (ChIP) and ChIP-qPCR.** SIM-A9 cell cultures were crosslinked with 1% (v/v) formaldehyde in crosslinking buffer (50 mM Hepes pH 8.0, 0.1 M NaCl, 0.1 mM EDTA pH 8.0, 0.5 mM EGTA pH 8.0). After 10 min of incubation at 37°C, the crosslinking reaction was stopped with 125 mM glycine for 5 min at room temperature. After washing twice with cold PBS, cells were collected by scraping in PBS supplemented with Protease inhibitor cocktail (PIC, Sigma-Aldrich, Cat. 11836170001) and PMSF (ITW Reagents, Cat. A0999). Cells were lysed by consecutively resuspending the pellet in two different lysis buffers (5 mM PIPES pH 8.0, 85 mM KCl, 0.5% IGEPAL and PIC, and 1% SDS, 10 mM EDTA pH 8.0, 50 mM Tris-HCl pH 8.1 and PIC) with a centrifugation step in between. Lysates were sonicated with Digital Sonifier 450 (Branson) to obtain chromatin fragments of 200-500 bp. Samples were incubated with anti-BRD4 antibody (Bethyl) and retrieved with Protein G-Dynabeads (Thermo Fisher,

Cat. 1004D). After the cross-linking was reversed, chromatin fragments were treated with proteinase K. DNA fragments were purified using a ChIP DNA Clean & Concentrator Kit (Zymo Research, Cat. D5205). qPCR was performed as described above. In order to analyze the qPCR data of immunoprecipitated samples, normalization to the input DNA was performed. Primers pairs (Sigma-Aldrich) specific for *Il6*, *Tnfα* and *Ifnβ1* gene promoters were designed to define an amplicon of 100-170 bp (Table S3).

**RNA-Seq analyses.** RNA-Seq analyses were carried out by the Genomics Unit, CABIMER (Andalusian Center for Molecular Biology and Regenerative Medicine, Seville, Spain). For transcriptional analyses of MOK-KO vs. WT SIM-A9 cells, total RNA-Seq was used. After removing the culture supernatant, cells were washed twice with PBS and RNA was extracted using the RNeasy Mini Kit (Qiagen, Cat. 74104) according to the manufacturer's guidelines. RNA samples were quantified using Qubit RNA HS Assay Kit and RNA size profile and integrity were analysed on Bioanalyzer 2100 (Agilent). RNA quality was considered 'excellent' and RNA integrity number estimates for all samples were between 9.7 and 10.0. After ribosomal RNA depletion, strand-specific (cDNA) libraries preparation was performed by applying Stranded TOTAL RNA prep Ligation with RIBO-ZERO PLUS kit (Illumina), following the manufacturer's instructions. Adapters (Illumina) included a sample/library-specific index. After library amplification by PCR and all recommended quality control assays, libraries were normalised using Qubit and quality control was performed with Bioanalyzer 2100. Individual libraries were pooled together at equimolar ratios and diluted to ~1.2 nM. Pooled libraries were denatured and further diluted prior to loading on the sequencer. Paired-end sequencing was performed using a NovaSeq6000 SP and 2x50bp (Illumina), generating a raw read count of >68 million reads per sample. Sequencing quality as assessed with BaseSpace Hub software (Illumina) was high (89.8% >Q30 and >106 Gb depth).

For mRNA-Seq transcriptional analyses from primary microglial cells, sequencing of mRNA was carried out. The procedure was as described above, with the following changes: mRNA was isolated by using poly-dT-coated beads and libraries were prepared by the TruSeq Stranded mRNA kit (Illumina). After library amplification by PCR and all recommended quality control assays, individual libraries were pooled together at equimolar ratios and diluted to ~1.4 pM. Paired-end sequencing was performed using NextSeq 500 Mid Output and 2x75pb (Illumina), generating a raw read count of >24 million reads per sample. Sequencing quality as assessed with BaseSpace Onsite software (v. 3.22.91.158, Illumina) was high (88% >Q30 and >24 Gb depth).

**RNA-Seq and mRNA-Seq data processing.** RNA-Seq sequencing data were generated from four cell treatments with three biological replicates each (12 samples in total), by using the paired end approach of Illumina technique. Total paired end fastq files were used for the RNA-Seq analysis via the pipeline: FastQC-Trimomatic-STAR-FeatureCounts-DESeq2. STAR aligner (v. 2.7.9a) was used to perform read alignment and mapping to the reference genome, the latest release of the mouse genome from Ensembl (*Mus musculus*) genome database. The feature Counts module of R-package

Rsubread (v. 2.0.1) was used for extracting raw read counts for all the samples. These raw read counts were then used to perform the differential expression analysis by using the DESeq2 package (v. 1.32.0) in R. Data analyses was performed by Bencos Research Solutions Pvt. Ltd. (Thane, Maharashtra 400615, IN).

mRNA-Seq sequencing data were generated from two cell treatments with three biological replicates each (6 samples in total) as described above, with the following changes: Fastq files were generated with the pipeline FASTQ Toolkit (v1.0.0, Illumina) with filtering, trimming and de-multiplexing data. The reference genome was *Mus musculus* (UCSC mm10). Cufflinks Assembly & DE, BaseSpace Workflow (v. 2.1.0, Illumina) was used to perform the differential expression analysis.

**Gene set enrichment analyses. Gene ontology (GO), pathway enrichment and ingenuity pathway analysis (IPA).** For each comparison group of SIM-A9 cells (WT, WT+LPS, MOK-KO, MOK-KO+LPS), gene ontology and pathway enrichment analyses were performed using the R-package PathfindR (v1.6.2). All differentially expressed genes (DEGs) obtained after applying the filter on Log<sub>2</sub> Fold Change values >2 or <-2 along with P value <0.05 were used as input to perform enrichment for the following categories: GO Biological Process, GO Cellular Component, GO Molecular Function and KEGG Pathway with analyses performed by Bencos Research Solutions Pvt. Ltd. (Thane, Maharashtra 400615, IN). Ingenuity Pathway Analysis was applied on DEGs as defined above.

**S4U-labeling and SLAM-Seq analysis.** After pre-treatment with 10 µg/mL polymixin B, SIM-A9 cells in culture were incubated with 10 µg/mL C13 (or DMSO) for 1 h. Then, one tenth volume of medium without serum containing TDP-43 or sham aggregates (5 µg/mL final) was added to each well and incubated for 2.5 hours. This was followed by addition of 4-thiouridine (S4U, Cayman Chemical, Cat. 16373) to a final concentration of 100 µM (found by us to retain 80% of cells viability by MTT assay after 2 h) and incubation for a further 90 min in the dark. After washing with PBS, total RNA was extracted with easy-BLUE (iNtRON Biotechnology) and protected from light during the procedure to prevent S-S cross-binding. 5 µg of RNA was used for SLAM-seq modifications, as previously described (10). Briefly, iodoacetamide (Sigma I1149) was conjugated to 4SU in a 50 mM pH 8.0 phosphate buffer in DMSO/Water (1:1), the reaction was quenched with DTT and RNA was reprecipitated using ethanol and NaOAc. Libraries were prepared using Quantseq 3' mRNA-Seq Library Prep Kit (Lexogen). SLAM-Seq analysis was done similar to previously reported (11).

**Statistical analyses.** Data are presented as mean ± SEM of N independent experiments, unless indicated otherwise. Statistical analyses were performed using either One-way ANOVA followed by Tukey's post-hoc test or Student's t-test in the GraphPad Prism software, two-/one-tailed as indicated in the corresponding figure legend. P values less than or equal to 0.05 were considered statistically significant. Statistical analyses were performed using Prism v.8 software (GraphPad).

## Supplemental references

1. J.C. Oliveros, Venny. An interactive tool for comparing lists with Venn's diagrams. <https://bioinfogp.cnb.csic.es/tools/venny/index.html> (2007-2015).
2. A. L. Garske, U. Peters, A. T. Cortesi, J. L. Perez, K. M. Shokat, Chemical genetic strategy for targeting protein kinases based on covalent complementarity. *Proc. Natl. Acad. Sci.* **108**, 15046–15052 (2011).
3. Y. Miyata, Y. Ikawa, M. Shibuya, E. Nishida, Specific association of a set of molecular chaperones including HSP90 and Cdc37 with MOK, a member of the mitogen-activated protein kinase superfamily. *J. Biol. Chem.* **276**, 21841–21848 (2001).
4. I. Wegorzewska, *et al.*, TDP-43 mutant transgenic mice develop features of ALS and frontotemporal lobar degeneration. *Proc. Natl. Acad. Sci. U. S. A.* **106**, 18809–18814 (2009).
5. M. E. Gurney, *et al.*, Motor neuron degeneration in mice that express a human Cu,Zn superoxide dismutase mutation. *Science* **264**, 1772–1775 (1994).
6. M. M. Leal-Lasarte, J. M. Franco, A. Labrador-Garrido, D. Pozo, C. Roodveldt, Extracellular TDP-43 aggregates target MAPK/MAK/MRK overlapping kinase (MOK) and trigger caspase-3/IL-18 signaling in microglia. *FASEB J.* **31**, 2797–2816 (2017).
7. C. Capitini, S. Conti, M. Perni, F. Guidi, R. Cascella, TDP-43 inclusion bodies formed in bacteria are structurally amorphous, non-amyloid and inherently toxic to neuroblastoma cells. *PLoS One* **9**, 86720 (2014).
8. R. Cascella, *et al.*, Quantification of the relative contributions of loss-of-function and gain-of-function mechanisms in TAR DNA-binding protein 43 (TDP-43) proteinopathies. *J. Biol. Chem.* **291**, 19437–19448 (2016).
9. V. Arce *et al.*, Cardiotrophin-1 requires LIFRbeta to promote survival of mouse motoneurons purified by a novel technique. *J Neurosci Res.* **55**, 119–126 (1999).
10. V. A. Herzog, *et al.*, Thiol-linked alkylation of RNA to assess expression dynamics. *Nat Methods* **14**, 1198–1204 (2017).
11. T. Neumann, *et al.*, Quantification of experimentally induced nucleotide conversions in high-throughput sequencing datasets. *BMC Bioinforma.* **20**, 258 (2019).

**Table S1. List of primary antibodies used**

| <b>Antibodies</b>               | <b>Host</b> | <b>Manufacturer</b>       | <b>Catalog number</b> | <b>Application</b> |
|---------------------------------|-------------|---------------------------|-----------------------|--------------------|
| MOK                             | Rabbit      | Abxexa                    | abx027945             | IHC, WB            |
| MOK<br>(pT159+pY161)<br>(bpMOK) | Rabbit      | StressMarq<br>Biosciences | SPC-1030              | IF<br>Flow Cytom   |
| Phospho-Ser/Thr<br>Brd4         | Rabbit      | Abcam                     | ab17464               | IP                 |
| Phospho Brd4<br>(Ser492)        | Rabbit      | Bethyl                    | A301-985A100          | ChIP               |
| Non-immune IgG                  | Rabbit      | Millipore                 | ABE1451               | IF, WB             |
| FLAG, APC-<br>conjugated        | Mouse       | Sigma-Aldrich             | I5006                 | ChIP, Co-IP        |
| IL-6, PE-conjugated             | Mouse       | Abcam                     | ab72569               | Flow Cytom         |
| IL-18                           | Rat         | BD<br>Biosciences         | AB_395367             | Flow Cytom         |
| p65                             | Rabbit      | Mybiosource               | MBS559603             | WB                 |
| p-p65                           | Rabbit      | Cell Signaling            | Cat. 3034             | WB                 |
| CD11b, APC-<br>conjugated       | Rabbit      | Thermo<br>Scientific      | Cat. PA5-17782        | WB                 |
| Caspase-1                       | Rat         | BD<br>Biosciences         | 553312                | Flow Cytom         |
| GAPDH                           | Mouse       | Adipogen                  | AG-20B-0042-C100      | WB                 |
| $\alpha$ -tubulin               | Mouse       | Millipore                 | MAB-374               | WB                 |
|                                 | Mouse       | Sigma-Aldrich             | T6199                 | WB                 |

**Table S2. List of secondary antibodies used**

| <b>Antibodies</b>                   | <b>Host</b> | <b>Manufacturer</b>           | <b>Catalog number</b> | <b>Application</b> |
|-------------------------------------|-------------|-------------------------------|-----------------------|--------------------|
| Anti-rabbit IgG,<br>HRP conjugated  | Goat        | Thermo Scientific<br>(Pierce) | 31460<br>(1858415)    | WB                 |
| Anti-mouse IgG,<br>HRP conjugated   | Goat        | Thermo Scientific<br>(Pierce) | 32430<br>(1858413)    | WB                 |
| Anti-rabbit IgG,<br>Alexa- Fluor488 | Donkey      | Thermo Fisher                 | A-21206               | IF                 |
| Anti-rabbit IgG,<br>Alexa-Fluor546  | Donkey      | Thermo Fisher                 | A-10040               | IF                 |

**Table S3. List of PCR primers used**

| Primer name                      | Direction | Primer sequence                |
|----------------------------------|-----------|--------------------------------|
| MOK                              | For       | 5'-GTTCTACGAGATTGCCAGCCT -3'   |
|                                  | Rev       | 5'-CTGCTTTCTGCCTTCCTGTGAGA -3' |
| HPRT                             | For       | 5'-GGACTAATTATGGACAGGACTG -3'  |
|                                  | Rev       | 5'-TCCAGCAGGTCAGCAAAGAA -3'    |
| IL-6                             | For       | 5'-TCCGGAGAGGAGACTTCACA -3'    |
|                                  | Rev       | 5'-TTCTGCAAGTGCATCATCGT -3'    |
| TNF $\alpha$                     | For       | 5'-GCCTCTTCTCATTCCCTGCTTG -3'  |
|                                  | Rev       | 5'-CTGATGAGAGGGAGGCCATT -3'    |
| IFN $\beta$                      | For       | 5'-CCACCAGCAGACAGTGTTTC -3'    |
|                                  | Rev       | 5'-GAAGATCTCTGCTCGGACCA -3'    |
| IL-1 $\alpha$                    | For       | 5'-CGAAGACTACAGTTCTGCCATT -3'  |
|                                  | Rev       | 5'-GACGTTTCAGAGGTTCTCAGAG -3'  |
| IRF7                             | For       | 5'-GGTCGTAGGGATCTGGATGA -3'    |
|                                  | Rev       | 5'-ACCTTATGCGGATCAACTGG -3'    |
| IL6 prom. <sup>28</sup>          | For       | 5'-TGTGGGATTTTCCCATGAGT -3'    |
|                                  | Rev       | 5'-TGCCTTCACTTACTTGCAGAGA -3'  |
| TNF $\alpha$ prom. <sup>71</sup> | For       | 5'-GGACTAGCCAGGAGGGAGAA -3'    |
|                                  | Rev       | 5'-TGTCTTTTCTGGAGGGAGATGT -3'  |
| IFN $\beta$ prom. <sup>72</sup>  | For       | 5'-GCCAGGAGCTTGAATAAAATG -3'   |
|                                  | Rev       | 5'-CTGTCAAAGGCTGCAGTGAG -3'    |



## Legends for Datasets S1 to S12

**Dataset S1.** DSeq analysis results of SLAM-Seq RNA-sequencing data obtained from SIM-A9 microglial cells exposed to 5 µg/mL TDP-43 or sham aggregates for 4 h, pre-treated with 10 µM C13 or vehicle for 1 h (N=3).

**Dataset S2.** LC-MS/MS analysis results of anti-phospho-Ser/Thr immunoprecipitation eluate from primary microglial cells exposed to 5 µg/mL TDP-43 aggregates for 5 h, pre-treated with vehicle for 1 h.

**Dataset S3.** LC-MS/MS analysis results of anti-phospho-Ser/Thr immunoprecipitation eluate from primary microglial cells exposed to 5 µg/mL TDP-43 aggregates for 5 h, pre-treated with 10 µM C13 for 1 h.

**Dataset S4.** DSeq analysis results of RNA-Seq data obtained from primary microglial cells treated with 1 µg/mL LPS for 5 h, pre-treated with 10 µM C13 or vehicle for 1 h.

**Dataset S5.** Ingenuity pathway analysis (IPA) results of 'LPS+C13 vs. LPS' DEGs from RNA-Seq data (Dataset S4).

**Dataset S6.** 'MOK-KO vs. WT' DSeq2 analysis results of RNA-Seq data from MOK-KO or WT SIM-A9 cells treated or not with 1 µg/mL LPS for 5 h (N=3).

**Dataset S7.** 'WT+LPS vs. WT' DSeq2 analysis results of RNA-Seq data from WT SIM-A9 cells treated or not with 1 µg/mL LPS for 5 h (N=3).

**Dataset S8.** 'MOK-KO+LPS vs. MOK-KO' DSeq2 analysis results of RNA-Seq data from MOK-KO SIM-A9 cells treated or not with 1 µg/mL LPS for 5 h (N=3).

**Dataset S9.** MOK-KO+LPS vs. WT+LPS' DSeq2 analysis results of RNA-Seq data from MOK-KO and WT SIM-A9 cells treated or not with 1 µg/mL LPS for 5 h (N=3).

**Dataset S10.** Gene ontology (GO) enrichment analysis results for 'MOK-KO+LPS vs. WT+LPS' DEGs from RNA-Seq data (Dataset S9, N=3).

**Dataset S11.** Gene ontology (GO) enrichment analysis results for 'WT+LPS vs. WT' 985 selected DEGs list from RNA-Seq data (DEGs selected from Dataset S7, N=3).

**Dataset S12.** Ingenuity pathway analysis (IPA) from 'MOK-KO+LPS vs. WT+LPS' DEGs from RNA-Seq data (Dataset S9, N=3).
